# Supplementary material
Source: PubMed Central journal article supplement (PMC10642450)
Supplement: NIHMS1605500-supplement-Supporting_information.pdf [file NIHMS1605500-supplement-Supporting_information.pdf]

# Supporting Information:

## Repositioning of 8565 Existing Drugs for COVID-19

Kaifu Gao,<sup>†</sup> Duc Duy Nguyen,<sup>‡</sup> Jiahui Chen,<sup>†</sup> Rui Wang,<sup>†</sup> and Guo-Wei Wei<sup>\*,†,¶,§</sup>

<sup>†</sup>*Department of Mathematics, Michigan State University, MI 48824, USA*

<sup>‡</sup>*Department of Mathematics, University of Kentucky, KY 40506, USA*

<sup>¶</sup>*Department of Biochemistry and Molecular Biology Michigan State University, MI 48824,  
USA*

<sup>§</sup>*Department of Electrical and Computer Engineering Michigan State University, MI  
48824, USA*

E-mail: [wei@math.msu.edu](mailto:wei@math.msu.edu)

## Supporting analyses and models

### Main protease sequence identity and 3D structure similarity analysis

The sequence identity is defined as the percentage of characters that match exactly between two different sequences. Calculated by SWISS-MODEL,<sup>S1</sup> the sequence identities between the SARS-CoV-2 3CL protease and that of SARS-CoV, MERS-CoV, HKU-1, OC43, HCoVNL63, 229E, and HIV are 96.1%, 52.0%, 49.0%, 48.4%, 45.2%, 41.9%, and 23.7%, respectively.

It is seen that the SARS-CoV-2 3CL protease is very close to the SARS-CoV 3CL protease, but distinguished from other proteases. SARS-CoV-2 has a strong genetic relationship

with SARS-CoV, the sequence alignment in Figure S1 further confirms their relationship.

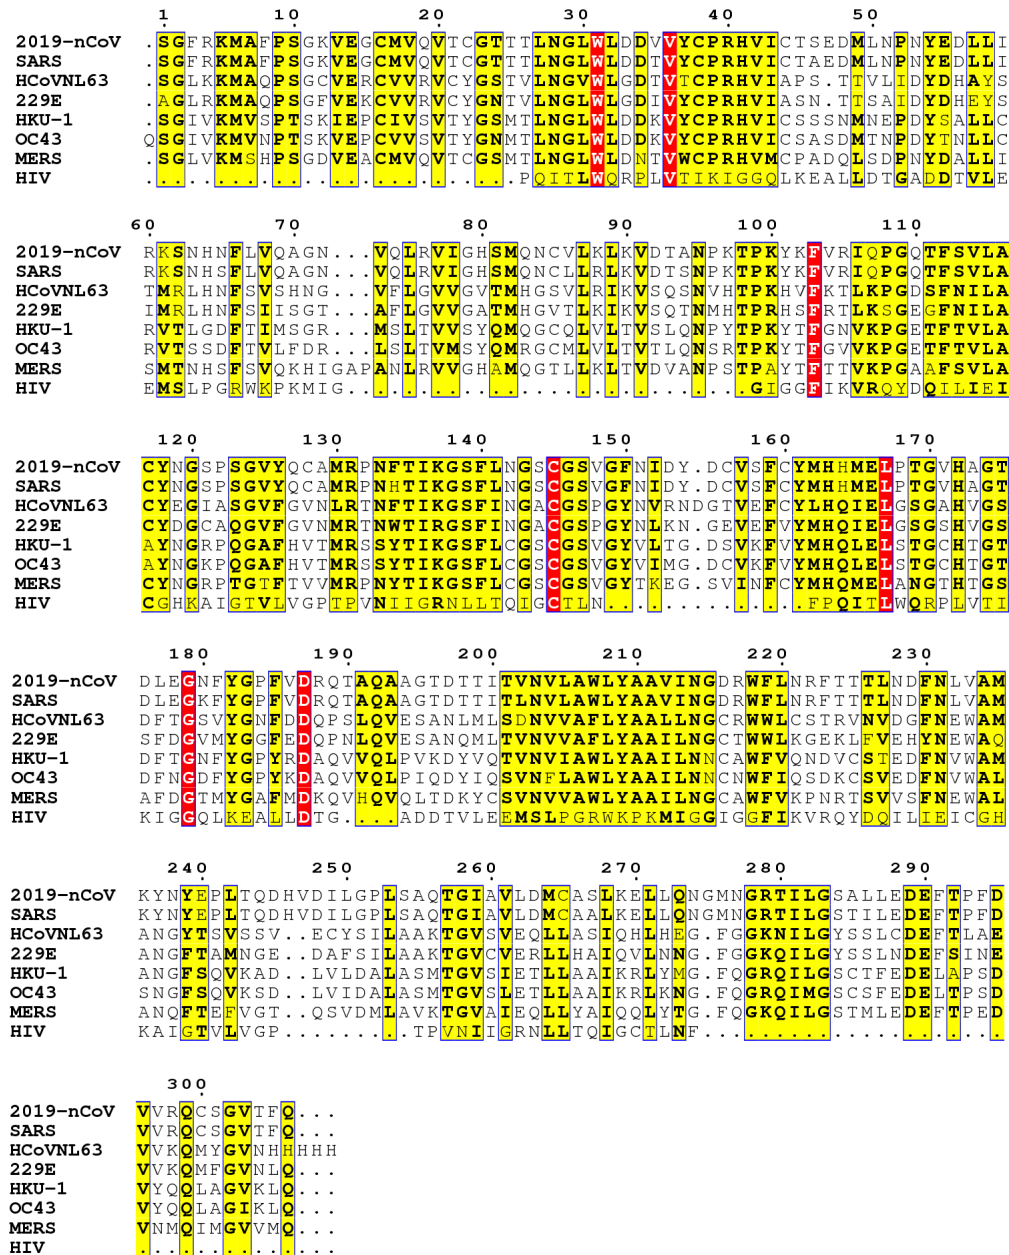

Figure S1: The 3CL protease sequence alignment between SARS-CoV-2, SARS-CoV, MERS, OC43, HCoVNL63, HKU-1, 229E, and HIV.

Not only are the sequences highly identical, but also, as shown in Fig. S2 the 3D crystal structures of the SARS-CoV-2 3CL protease is also substantially similar to that of SARS-CoV 3CL protease. Particularly, the RMSD of two structures at the binding site is only 0.42 Å.

The high sequence and structure similarity between the two proteases suggests that anti-SARS-CoV chemicals can be equally effective for the treatment of SARS-CoV-2. It means the available experimental data of SARS-CoV protease inhibitors can also be used as the training set to discover new inhibitors of SARS-CoV-2 protease. Our SARS-CoV-2 BA training set contains 314 compounds with their binding affinities to the SARS-CoV or SARS-CoV-2 3CL protease from single-protein experiments available.

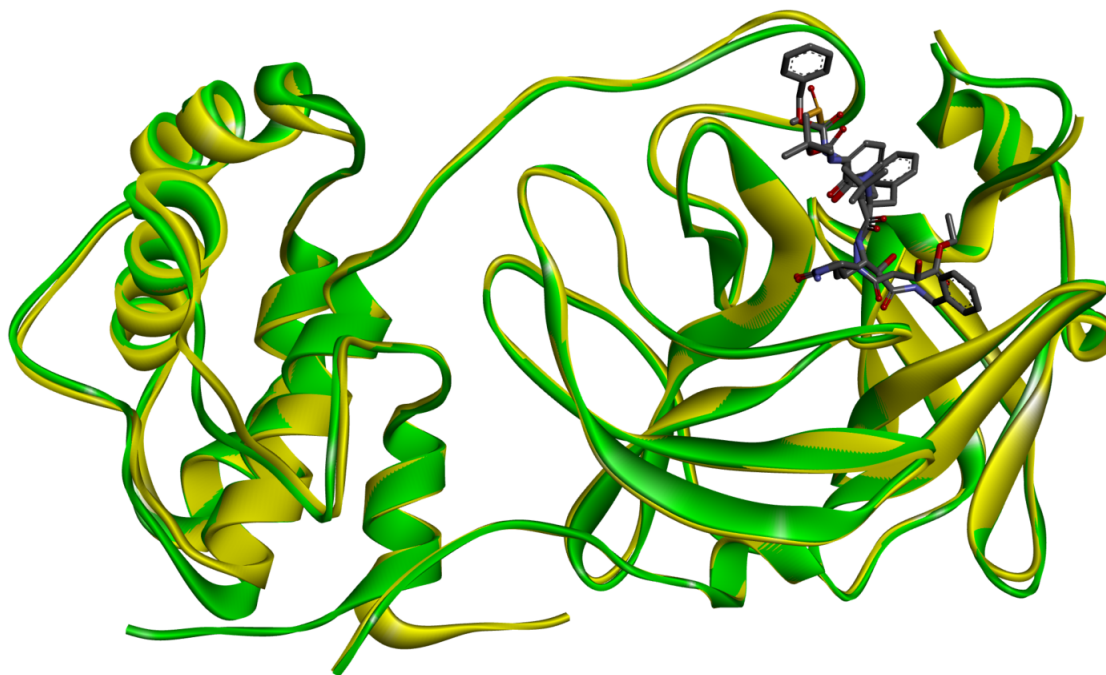

Figure S2: Illustration of the 3D structure similarity between the SARS-CoV-2 3CL protease (PDB ID: 6Y2F, in gold) and SARS-CoV 3CL protease (PDB ID: 2A5I, in green). The anti-SARS inhibitors in dark color indicate the binding site.

### The experimental $\Delta G$ distribution of the training set

The binding affinities of the SARS-CoV-s main protease inhibitor training set range from -3.68 kcal/mol to -11.08 kcal/mol. Their distribution is depicted in Figure S3.

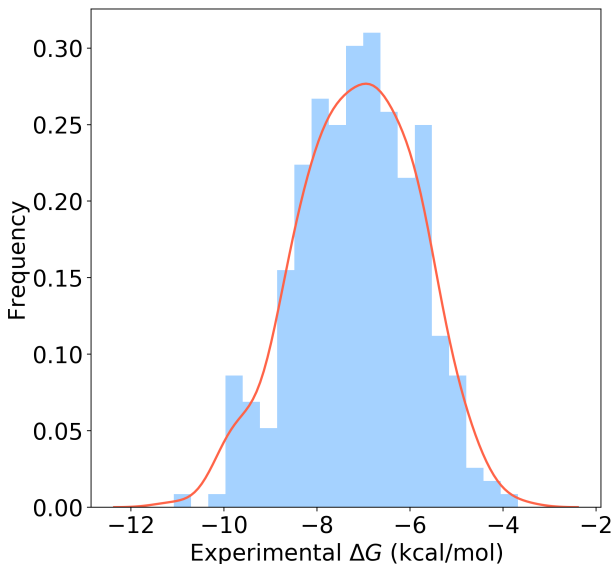

Figure S3: The experimental  $\Delta G$  distribution of the training set of SARS-CoV-2 3CL protease inhibitors.

## The hyperparameters in the machine learning-based binding affinity predictor

The GBDT parameters in our predictor are, for ECFP4, `n_estimators=10000,max_depth=7, min_samples_split=3,learning_rate=0.01, subsample=0.3,max_features='sqrt'`; for Estate1 and Estate2, `n_estimators=2000,max_depth=9,min_samples_split=3, learning_rate=0.01,subsample=0.3,max_features='sqrt'`.

## The 10-fold cross-validation of the binding affinity predictor

The 10-fold cross-validation is carried out using 50 random splittings. Results in terms of Pearson correlation coefficient ( $R_p$ ) the Kendall's  $\tau$  ( $\tau$ ), and RMSE are given in Table S1.

## MathDL

MathDL, designed for predicting various druggable properties of 3D molecules,<sup>S2</sup> is capable of efficiently and accurately encoding the high-dimensional biomolecular interactions into low-dimensional representations. Algebraic graph theory,<sup>S3</sup> differential geometry,<sup>S4</sup>

Table S1: The 10-fold cross-validation test of the machine learning model on the SARS-CoV-2 BA training set.

|                 | $R_p$ | $\tau$ | RMSE (kcal/mol) |  | $R_p$           | $\tau$ | RMSE (kcal/mol) |       |
|-----------------|-------|--------|-----------------|--|-----------------|--------|-----------------|-------|
| Fold 1 (Train)  | 0.997 | 0.972  | 0.095           |  | Fold 6 (Train)  | 0.997  | 0.972           | 0.096 |
| Fold 1 (Test)   | 0.794 | 0.600  | 0.778           |  | Fold 6 (Test)   | 0.777  | 0.582           | 0.777 |
| Fold 2 (Train)  | 0.997 | 0.972  | 0.095           |  | Fold 7 (Train)  | 0.997  | 0.971           | 0.096 |
| Fold 2 (Test)   | 0.759 | 0.571  | 0.818           |  | Fold 7 (Test)   | 0.781  | 0.588           | 0.780 |
| Fold 3 (Train)  | 0.997 | 0.971  | 0.095           |  | Fold 8 (Train)  | 0.997  | 0.971           | 0.096 |
| Fold 3 (Test)   | 0.791 | 0.607  | 0.783           |  | Fold 8 (Test)   | 0.770  | 0.576           | 0.811 |
| Fold 4 (Train)  | 0.997 | 0.971  | 0.096           |  | Fold 9 (Train)  | 0.997  | 0.972           | 0.094 |
| Fold 4 (Test)   | 0.780 | 0.579  | 0.781           |  | Fold 9 (Test)   | 0.762  | 0.578           | 0.801 |
| Fold 5 (Train)  | 0.997 | 0.972  | 0.095           |  | Fold 10 (Train) | 0.997  | 0.972           | 0.095 |
| Fold 5 (Test)   | 0.782 | 0.591  | 0.789           |  | Fold 10 (Test)  | 0.770  | 0.585           | 0.811 |
| Average (Train) | 0.997 | 0.972  | 0.095           |  |                 |        |                 |       |
| Average (Test)  | 0.777 | 0.586  | 0.792           |  |                 |        |                 |       |

and algebraic topology methods<sup>S2</sup> are applied to generate three mathematical representations of data in MathDL. These data representations can be integrated with well-designed deep learning models, such as gradient-boosted trees (GBTs) and convolutional neural networks (CNNs), for pose ranking and binding affinity predictions. In D3R Grand Challenges (<https://drugdesigndata.org/about/grand-challenge>), a worldwide competition series in computer-aided drug design, MathDL had been proved as the top competitor in free energy prediction and ranking in the past three years.<sup>S2,S5</sup> Figure S4 illustrates the framework of the MathDL model, which combined the aforementioned mathematical representations with the CNN architecture for druggable properties predictions. The PDBbind 2018 general set,<sup>S6</sup> along with the SARS 3CL protease related dataset is used in our training process. To address the reliability of the MathDL model, we did the 10-fold cross-validation on the various PDBbind refine sets with the average Pearson correlation coefficients and the root mean square error (RMSE) being 0.771 and 1.78 kcal/mol, respectively.<sup>S7</sup>

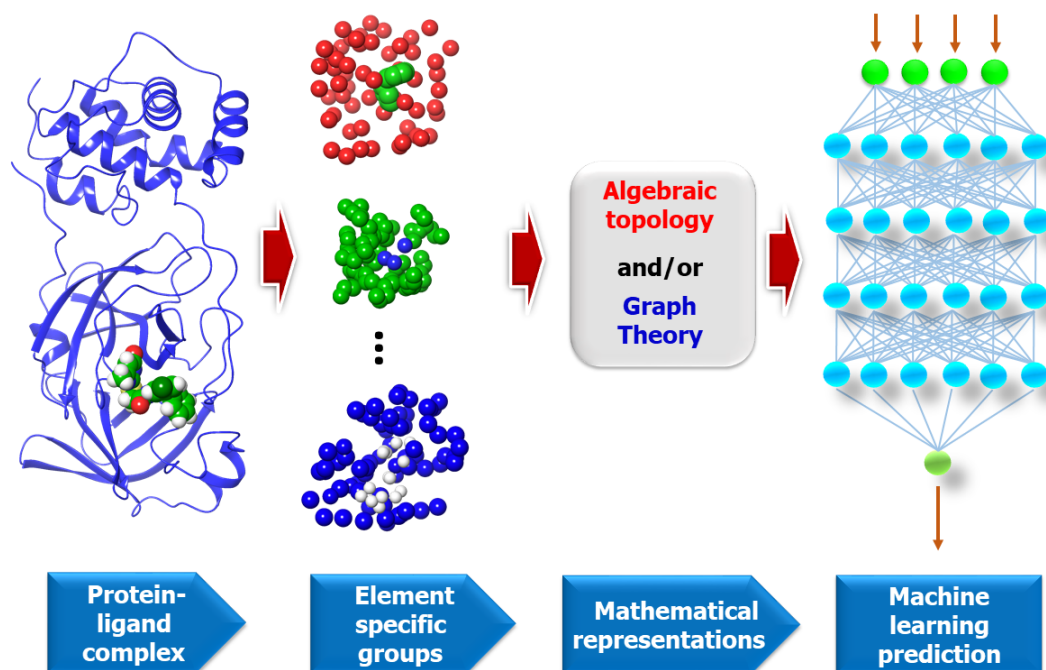

Figure S4: A framework of MathDL energy prediction model which integrates advanced mathematical representations with sophisticated CNN architectures

## Nonpolar binding site residues in SARS-CoV-2 Main protease

In the main protease's binding site, there are some nonpolar residues, namely Ala193, Gly143, Leu27, Leu141, Met165, Met49, Phe140, and Pro168.

## Supporting tables

Supporting tables are available in SupportingTables.xlsx for follows.

The table of experimental binding affinities, predicted synthesizability scores, predicted log P, and predicted log S for 314 SARS-CoV-2 3CL protease inhibitors in the training set

The table of the predicted binding affinities, predicted synthesizability scores, predicted log P, and predicted log S for 1553 FDA-approved drugs

The table of the predicted binding affinities for 7012 investigational or off-market drugs

## References

- (S1) Bienert, S.; Waterhouse, A.; de Beer, T. A.; Tauriello, G.; Studer, G.; Bordoli, L.; Schwede, T. The SWISS-MODEL Repository—new features and functionality. *Nucleic Acids Res.* **2017**, *45*, D313–D319.
- (S2) Nguyen, D. D.; Gao, K.; Wang, M.; Wei, G.-W. Mathdl: Mathematical deep learning for d3r grand challenge 4. *J. Comput. Aided Mol. Des.* **2020**, *34*, 131–147.
- (S3) Nguyen, D. D.; Wei, G.-W. AGL-Score: Algebraic Graph Learning Score for Protein–Ligand Binding Scoring, Ranking, Docking, and Screening. *J. Chem. Inf. Model.* **2019**, *59*, 3291–3304.
- (S4) Nguyen, D. D.; Wei, G.-W. DG-GL: Differential geometry-based geometric learning of molecular datasets. *Int. J. Numer. Method. Biomed. Eng.* **2019**, *35*, e3179.
- (S5) Nguyen, D. D.; Cang, Z.; Wu, K.; Wang, M.; Cao, Y.; Wei, G.-W. Mathematical deep learning for pose and binding affinity prediction and ranking in D3R Grand Challenges. *J. Comput. Aided Mol. Des.* **2019**, *33*, 71–82.

- (S6) Su, M.; Yang, Q.; Du, Y.; Feng, G.; Liu, Z.; Li, Y.; Wang, R. Comparative assessment of scoring functions: The CASF-2016 update. *J. Chem. Inf. Model.* **2018**, *59*, 895–913.
- (S7) Cang, Z.; Mu, L.; Wei, G.-W. Representability of algebraic topology for biomolecules in machine learning based scoring and virtual screening. *PLoS Comput. Biol.* **2018**, *14*, e1005929.
